# Supplementary material for: In vivo surveillance and elimination of teratoma‐forming human embryonic stem cells with monoclonal antibody 2448 targeting annexin A2
Source: PubMed Central journal article supplement (PMC6790577; doi:10.1002/bit.27135), 2019-08-30
Supplement: BIT-116-2996-s001.pdf [file BIT-116-2996-s001.pdf]

(A)

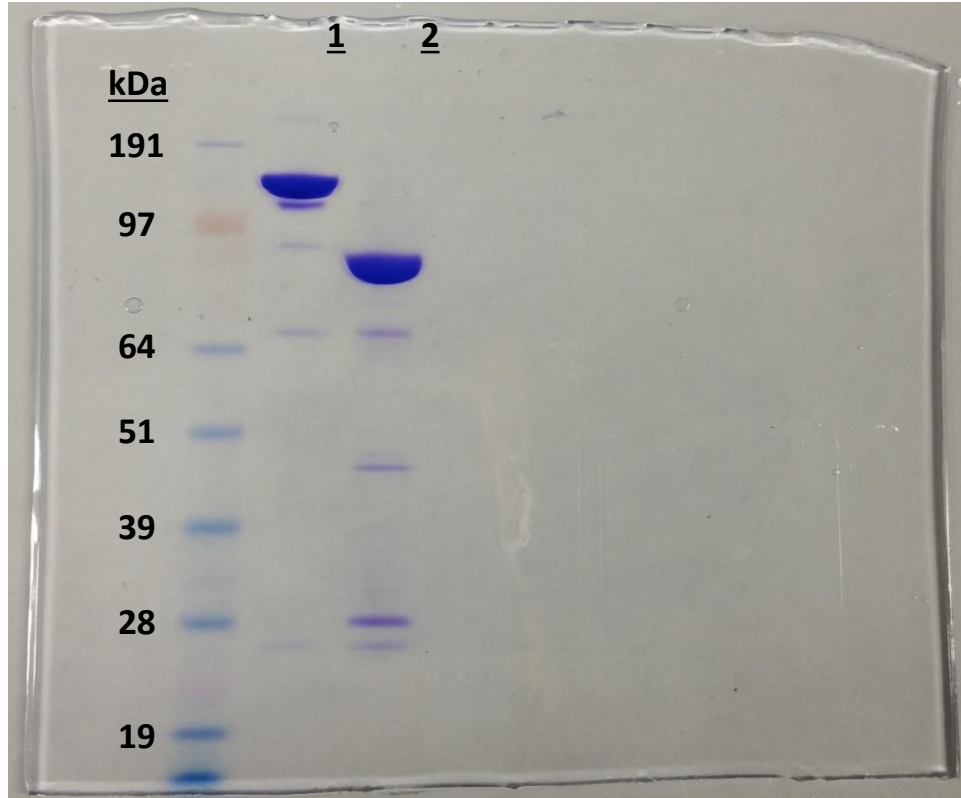

**Figure Legend**

Lane 1 : ch2448 IgG

Lane 2 : ch2448 F(ab')<sub>2</sub>

(B)

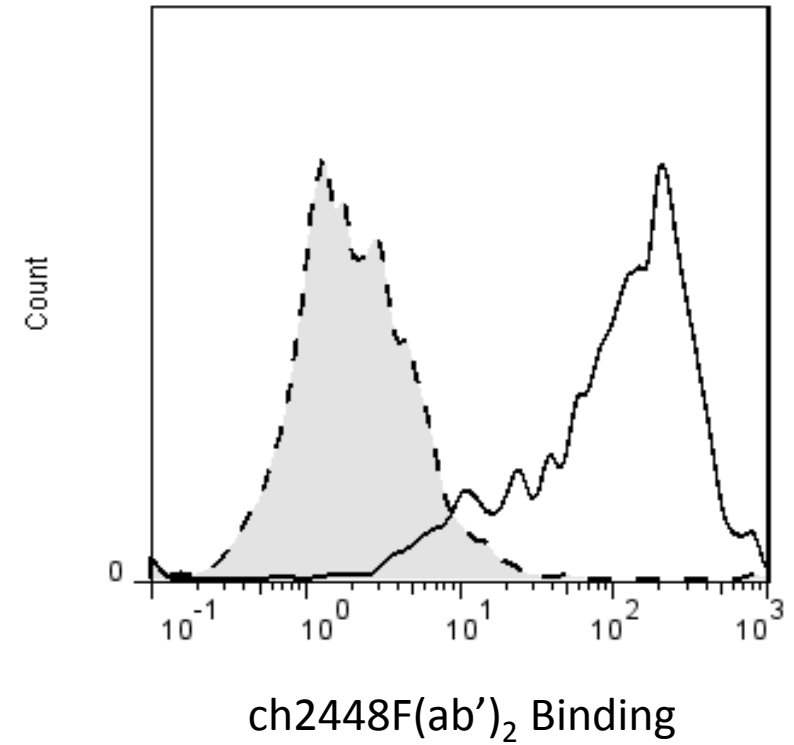

**Supplementary Figure 1.** (A) Enzymatic digestion of IgG ch2448 (Lane 1) to F(ab')<sub>2</sub> (Lane 2). (B) Via flow cytometry, the F(ab')<sub>2</sub> fragments retained binding to undifferentiated hESCs. Shaded, dashed-line histogram represents negative control. Bolded-line histogram represents primary mAb binding.

| Tukey's multiple comparisons test          | Mean Diff. | 95.00% CI of diff. | Significant? | Adjusted P Value |
|--------------------------------------------|------------|--------------------|--------------|------------------|
| <b>1.5µg</b>                               |            |                    |              |                  |
| Buffer vs. ch2448(Fab')2                   | 10717      | 4917 to 16517      | Yes          | <0.0001          |
| Buffer vs. Anti-Fab DM1                    | 36480      | 30680 to 42280     | Yes          | <0.0001          |
| Buffer vs. ch2448(Fab')2-DM1               | -18743     | -24543 to -12943   | Yes          | <0.0001          |
| Buffer vs. Anti-Fab MMAE                   | -19145     | -24945 to -13345   | Yes          | <0.0001          |
| Buffer vs. ch2448(Fab')2-MMAE (++)         | 251511     | 245711 to 257311   | Yes          | <0.0001          |
| ch2448(Fab')2 vs. Anti-Fab DM1             | 25762      | 19962 to 31562     | Yes          | <0.0001          |
| ch2448(Fab')2 vs. ch2448(Fab')2-DM1        | -29460     | -35260 to -23660   | Yes          | <0.0001          |
| ch2448(Fab')2 vs. Anti-Fab MMAE            | -29862     | -35662 to -24062   | Yes          | <0.0001          |
| ch2448(Fab')2 vs. ch2448(Fab')2-MMAE (++)  | 240794     | 234994 to 246594   | Yes          | <0.0001          |
| Anti-Fab DM1 vs. ch2448(Fab')2-DM1         | -55223     | -61023 to -49423   | Yes          | <0.0001          |
| Anti-Fab DM1 vs. Anti-Fab MMAE             | -55625     | -61425 to -49825   | Yes          | <0.0001          |
| Anti-Fab DM1 vs. ch2448(Fab')2-MMAE        | 215032     | 209232 to 220832   | Yes          | <0.0001          |
| ch2448(Fab')2-DM1 vs. Anti-Fab MMAE        | -402       | -6202 to 5398      | No           | >0.9999          |
| ch2448(Fab')2-DM1 vs. ch2448(Fab')2-MMAE   | 270254     | 264454 to 276054   | Yes          | <0.0001          |
| Anti-Fab MMAE vs. ch2448(Fab')2-MMAE (++)  | 270656     | 264856 to 276456   | Yes          | <0.0001          |
| <b>3.0µg</b>                               |            |                    |              |                  |
| Buffer vs. ch2448(Fab')2                   | 9061       | 3261 to 14861      | Yes          | 0.0008           |
| Buffer vs. Anti-Fab DM1                    | 49987      | 44187 to 55787     | Yes          | <0.0001          |
| Buffer vs. ch2448(Fab')2-DM1 (†)           | 185142     | 179342 to 190942   | Yes          | <0.0001          |
| Buffer vs. Anti-Fab MMAE                   | 2255       | -3545 to 8055      | No           | 0.8314           |
| Buffer vs. ch2448(Fab')2-MMAE (+++)        | 256202     | 250402 to 262002   | Yes          | <0.0001          |
| ch2448(Fab')2 vs. Anti-Fab DM1             | 40925      | 35125 to 46725     | Yes          | <0.0001          |
| ch2448(Fab')2 vs. ch2448(Fab')2-DM1 (†)    | 176081     | 170281 to 181881   | Yes          | <0.0001          |
| ch2448(Fab')2 vs. Anti-Fab MMAE            | -6806      | -12606 to -1006    | Yes          | 0.015            |
| ch2448(Fab')2 vs. ch2448(Fab')2-MMAE (+++) | 247141     | 241341 to 252941   | Yes          | <0.0001          |
| Anti-Fab DM1 vs. ch2448(Fab')2-DM1 (†)     | 135155     | 129355 to 140955   | Yes          | <0.0001          |
| Anti-Fab DM1 vs. Anti-Fab MMAE             | -47731     | -53531 to -41931   | Yes          | <0.0001          |
| Anti-Fab DM1 vs. ch2448(Fab')2-MMAE        | 206216     | 200416 to 212016   | Yes          | <0.0001          |
| ch2448(Fab')2-DM1 vs. Anti-Fab MMAE        | -182887    | -188687 to -177087 | Yes          | <0.0001          |
| ch2448(Fab')2-DM1 vs. ch2448(Fab')2-MMAE   | 71060      | 65260 to 76860     | Yes          | <0.0001          |
| Anti-Fab MMAE vs. ch2448(Fab')2-MMAE (+++) | 253947     | 248147 to 259747   | Yes          | <0.0001          |

**Supplementary Figure 2.** ANOVA was carried out across the various conditions using PRISM for both antibody dosages of 1.5 µg and 3.0 µg. The cytotoxicity of the ADCs were significant when compared to the respective controls (†, ††, †††; p < 0.01).

**Bright Field**

**2448-pHRodo**

**Merged**

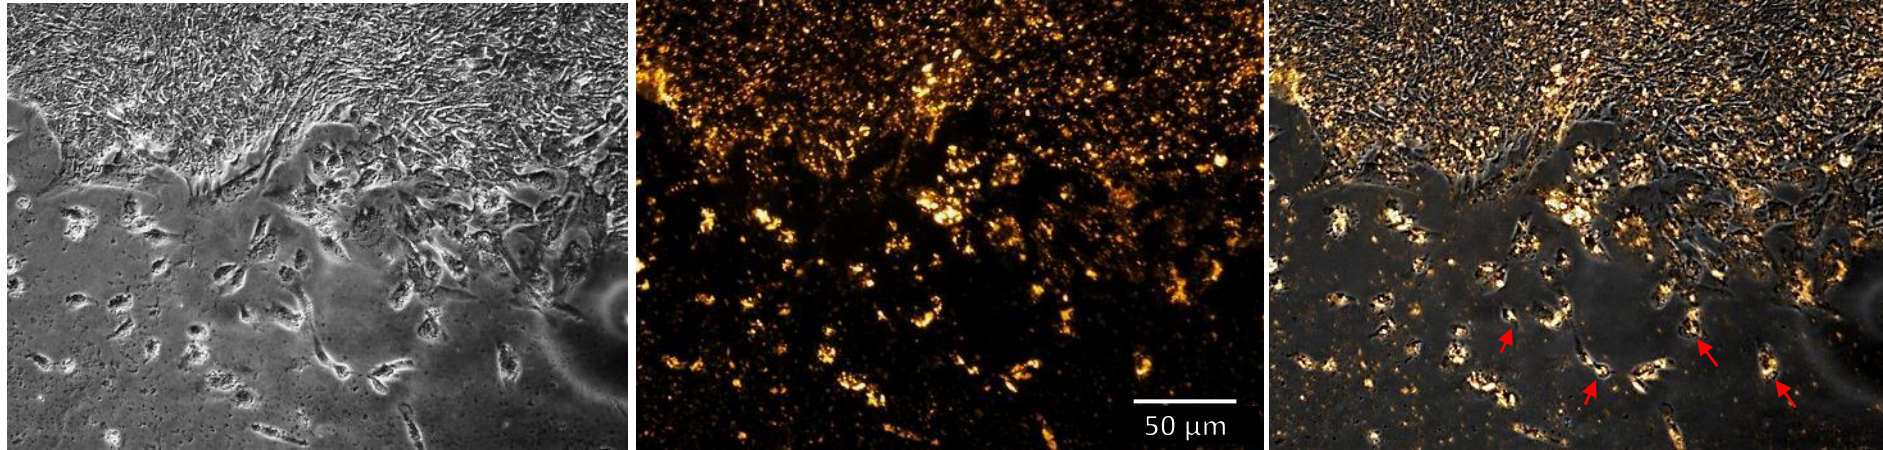

**Supplementary Figure 3.** ch2448 was conjugated to pHRodo dye which fluoresces maximally when it is internalized through the endosomes where the environment is acidic. When the cells were incubated with the mAbs, the antibody gets internalized and is observed to localize inside the cells. The red arrows indicate some cells with obvious internal localization of the mAb. The real time internalization of the antibody can be observed in the Supplementary Video.
